# Supplementary material
Source: PubMed Central journal article supplement (PMC5369573)
Supplement: flgastro-2014-100530-s1.pdf [file flgastro-2014-100530-s1.pdf]

## Appendix 1: The IBD index (IBDex©)

Please write the appropriate answer regarding the patient's condition in the last three days.

|     | Items                                                                                 | Responses                                                                                                                                                                                            |
|-----|---------------------------------------------------------------------------------------|------------------------------------------------------------------------------------------------------------------------------------------------------------------------------------------------------|
| 1.  | Stool frequency                                                                       | In the last 3 days, on average how many times did the patient open his/her bowels every day?                                                                                                         |
| 2.  | Stool consistency                                                                     | 0. Formed<br>1. Semi-formed<br>2. Mixed liquid and solid (a mushy stool)<br>3. Entirely liquid                                                                                                       |
| 3.  | Well being or energy level in the last 3 days                                         | 0. Well<br>1. Slightly Poorly<br>2. Very poorly<br>3. Extremely poorly/bed bound                                                                                                                     |
| 4.  | Performance status                                                                    | 0. No restriction of daily activities<br>1. Some restriction<br>2. Moderate restriction<br>3. Severe restriction                                                                                     |
| 5.  | Blood in the stool                                                                    | 0. Absent<br>1. Trace/small amount of blood<br>2. Occasional frank bleeding<br>3. Always frank bleeding                                                                                              |
| 6.  | Nocturnal diarrhoea                                                                   | In the last 3 days, on average how many times did the patient have to wake up to go to the toilet per night?                                                                                         |
| 7.  | Abdominal pain or discomfort on a score of 0 to 10<br>On average for the last 3 days. | Pain score represent the points                                                                                                                                                                      |
| 8.  | Urgency of defecation                                                                 | 0. None<br>1. Present, but patient can wait to get to toilet.<br>2. Present, patient needs to stop what he/she is doing and rush to toilet<br>3. Patient can't wait (had few incontinence accidents) |
| 9.  | Unintentional Weight loss in the last month                                           | 0. No weight loss<br>1. Weight loss                                                                                                                                                                  |
| 10. | Abdominal mass                                                                        | 0. None or not applicable<br>1. Doubtful/unsure<br>2. Definitely present                                                                                                                             |
| 11. | Abdominal tenderness                                                                  | 0. None<br>1. Mild<br>2. Marked/moderate<br>3. Rebound/severe                                                                                                                                        |
| 12. | Pulse                                                                                 | 0. Normal<br>1. Tachycardia                                                                                                                                                                          |
| 13. | Temperature                                                                           | 0. Normal<br>1. Pyrexia                                                                                                                                                                              |
| 14. | The presence of extra-intestinal manifestations on examination.                       | 1 point for each: Arthralgia, arthritis, Uveitis, Erythema nodosum, Pyoderma gangrenosum, Aphthus ulcer, new perianal complication ( fissure, fistula, abscess, anal stenosis, perianal ulcer)       |
